# Supplementary material
Source: publisher figshare collection journal article supplement (https://frontiersin.figshare.com/ndownloader/files/15024791)
Supplement: Supplementary file 1 [file 15024791]

**Supplementary Table 1.** Individual manta rays, sightings and survey days, recordedbetween June 2004 and April 2018, within Nusa Penida overall, Manta Bay (MB) and Manta Point (MP). Daily duplicates are removed (n = 163).

| Year | Individuals | | | Sightings | | | Unique Days | | |
| --- | --- | --- | --- | --- | --- | --- | --- | --- | --- |
|  | All | MB | MP | All | MB | MP | All | MB | MP |
| 2004 - 11 | 136 | 29 | 122 | 174 | 34 | 140 | 72 | 18 | 55 |
| 2012 | 186 | 146 | 56 | 506 | 448 | 58 | 99 | 89 | 20 |
| 2013 | 315 | 203 | 166 | 1092 | 846 | 246 | 149 | 125 | 46 |
| 2014 | 332 | 203 | 189 | 1219 | 833 | 386 | 173 | 137 | 62 |
| 2015 | 261 | 76 | 216 | 563 | 121 | 442 | 87 | 32 | 64 |
| 2016 | 336 | 104 | 278 | 990 | 262 | 728 | 136 | 51 | 96 |
| 2017 | 368 | 147 | 280 | 1131 | 354 | 777 | 200 | 107 | 132 |
| 2018* | 239 | 87 | 165 | 412 | 131 | 281 | 49 | 22 | 36 |
| **TOTAL** | **624** | **497** | **494** | **6087** | **3029** | **3058** | **965** | **581** | **511** |

*To April only
